# Supplementary material
Source: PubMed Central journal article supplement (PMC5555369)

Appendix Figure A1. Dosimetric correlation showed strong association between D99 and D95 ( $R^2=0.90$  with ANOVA  $p<0.0001$ ). The dotted lines indicate the 95% confidence interval for individual observations. Solid line indicate reference lines for D99=98.7 Gy and D95=134.5 Gy.

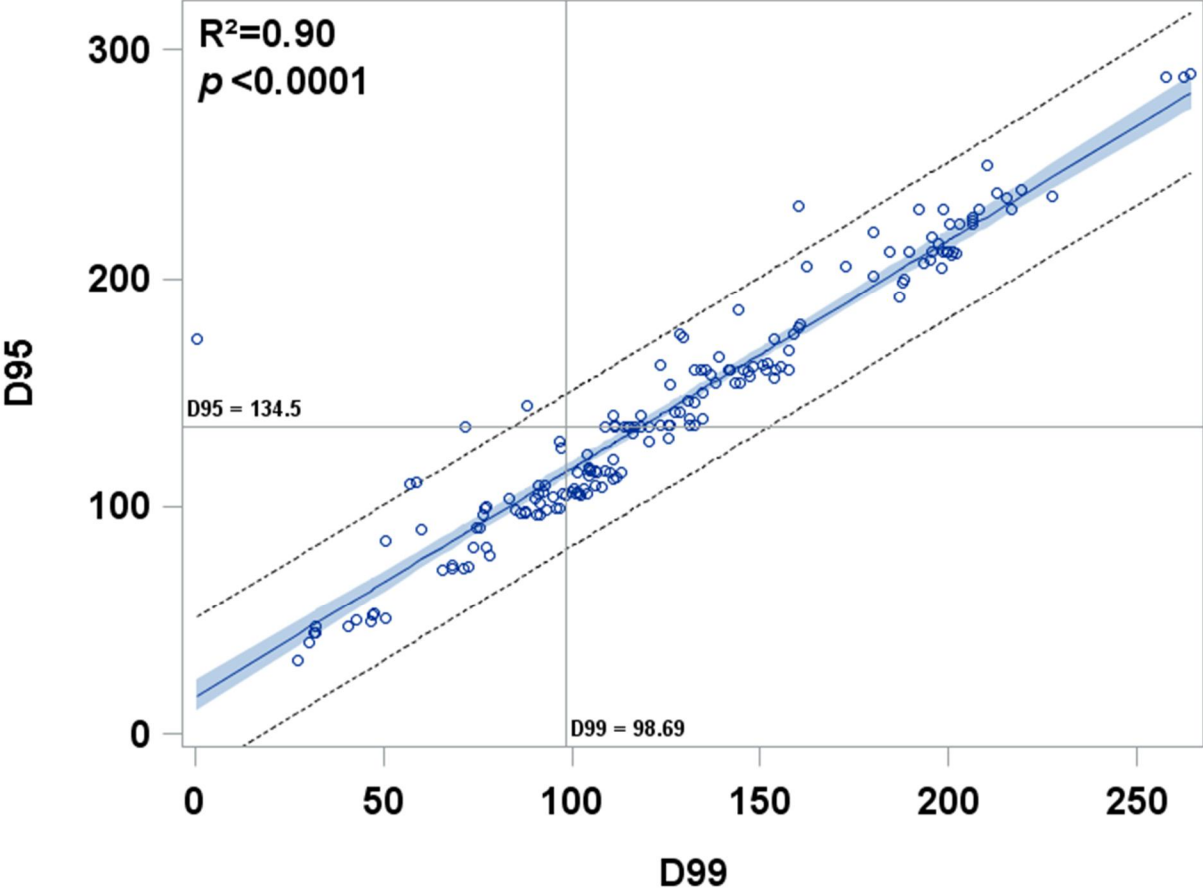

Supplement: NIHMS876292-supplement-Fig__E1.pdf [file NIHMS876292-supplement-Fig__E1.pdf]
