# Supplementary material
Source: PubMed Central journal article supplement (PMC5555369)
Supplement: NIHMS876292-supplement-Table_E1.pdf [file NIHMS876292-supplement-Table_E1.pdf]

Appendix Table A1. Radiation Regimen

| Fx | Dose/fx (Gy) | Median (Gy) | Mode (Gy) | No. |
|----|--------------|-------------|-----------|-----|
| 1  | 8 – 40       | 21          | 20        | 66  |
| 3  | 8 – 18       | 10.5        | 10        | 42  |
| 4  | 4 – 10       | 9           | 7.67      | 3   |
| 5  | 4 – 12       | 8           | 8         | 63  |
