# Supplementary material
Source: PubMed Central journal article supplement (PMC5555369)
Supplement: NIHMS876292-supplement-Table_E2.pdf [file NIHMS876292-supplement-Table_E2.pdf]

**Appendix Table A2. UT Southwestern Institutional Radiation Dose Constrains, December 2016**

**One Fraction**

| <b>Serial Tissue</b>        | <b>Volume</b>                            | <b>Volume Max (Gy)</b>               | <b>Max Point Dose (Gy)**</b> | <b>Endpoint (≥Grade 3)</b>     |
|-----------------------------|------------------------------------------|--------------------------------------|------------------------------|--------------------------------|
| Optic Pathway               | <0.2 cc                                  | 8 Gy                                 | 10 Gy                        | neuritis                       |
| Cochlea                     |                                          |                                      | 9 Gy                         | hearing loss                   |
| Brainstem (not medulla)     | <0.5 cc                                  | 10 Gy                                | 15 Gy                        | cranial neuropathy             |
| Spinal Cord and medulla     | <0.35 cc                                 | 10 Gy                                | 14 Gy                        | myelitis                       |
| Cauda Equina                | <5 cc                                    | 14 Gy                                | 16 Gy                        | neuritis                       |
| Sacral Plexus               | <5 cc                                    | 14.4 Gy                              | 16 Gy                        | neuropathy                     |
| Esophagus*                  | <5 cc                                    | 20 Gy                                | 24 Gy                        | esophagitis                    |
| Brachial Plexus             | <3 cc                                    | 13.6 Gy                              | 16.4 Gy                      | neuropathy                     |
| Heart/Pericardium           | <15 cc                                   | 16 Gy                                | 22 Gy                        | pericarditis                   |
| Great vessels               | <10 cc                                   | 31 Gy                                | 37 Gy                        | aneurysm                       |
| Trachea and Large Bronchus* | <4 cc                                    | 27.5 Gy                              | 30 Gy                        | impairment of pulmonary toilet |
| Bronchus- smaller airways   | <0.5 cc                                  | 17.4 Gy                              | 20.2 Gy                      | stenosis with atelectasis      |
| Rib                         | <5 cc                                    | 28 Gy                                | 33 Gy                        | Pain or fracture               |
| Skin                        | <10 cc                                   | 25.5 Gy                              | 27.5 Gy                      | ulceration                     |
| Stomach                     | <5 cc                                    | 17.4 Gy                              | 22 Gy                        | ulceration/fistula             |
| Bile duct                   |                                          |                                      | 30 Gy                        | stenosis                       |
| Duodenum*                   | <5 cc                                    | 17.4 Gy                              | 22 Gy                        | ulceration                     |
| Jejunum/Ileum*              | <30 cc                                   | 17.6 Gy                              | 20 Gy                        | enteritis/obstruction          |
| Colon*                      | <20 cc                                   | 20.5 Gy                              | 31 Gy                        | colitis/fistula                |
| Rectum*                     | <3.5 cc<br><20 cc                        | 30 Gy<br>23 Gy                       | 33.7 Gy                      | proctitis/fistula              |
| Ureter                      |                                          |                                      | 35 Gy                        | stenosis                       |
| Bladder wall                | <15 cc                                   | 12 Gy                                | 25 Gy                        | cystitis/fistula               |
| Penile bulb                 | <3 cc                                    | 16 Gy                                |                              | impotence                      |
| Femoral Heads               | <10 cc                                   | 15 Gy                                |                              | necrosis                       |
| Renal hilum/vascular trunk  | 15 cc                                    | 14 Gy                                |                              | malignant hypertension         |
|                             |                                          |                                      |                              |                                |
| <b>Parallel Tissue</b>      | <b>Critical Volume (cc)</b>              | <b>Critical Volume Dose Max (Gy)</b> |                              | <b>Endpoint (≥Grade 3)</b>     |
| Lung (Right & Left)         | 1500 cc for male and 950cc for female*** | 7.2 Gy                               |                              | Basic Lung Function            |
| Lung (Right & Left)         |                                          |                                      | V-8Gy <37%                   | Radiation Pneumonitis          |
| Liver                       | 700 cc***                                | 11.6 Gy                              |                              | Basic Liver Function           |
| Renal cortex (Right & Left) | 200 cc***                                | 9.5 Gy                               |                              | Basic renal function           |

**\*Avoid circumferential irradiation**

**\*\* “point” defined as 0.035cc or less**

**\*\*\*or one third of the “native” total organ volume (prior to any resection or volume reducing disease), whichever is greater**

### Three Fractions

| Serial Tissue               | Volume                                     | Volume Max (Gy)               | Max Point Dose (Gy)** | Endpoint (≥Grade 3)            |
|-----------------------------|--------------------------------------------|-------------------------------|-----------------------|--------------------------------|
| Optic Pathway               | <0.2 cc                                    | 15.3 Gy                       | 17.4 Gy               | neuritis                       |
| Cochlea                     |                                            |                               | 14.4 Gy               | hearing loss                   |
| Brainstem (not medulla)     | <0.5 cc                                    | 15.9 Gy                       | 23.1 Gy               | cranial neuropathy             |
| Spinal Cord and medulla     | <0.35 cc                                   | 15.9 Gy                       | 22.5 Gy               | myelitis                       |
| Cauda Equina                | <5 cc                                      | 21.9 Gy                       | 25.5 Gy               | neuritis                       |
| Sacral Plexus               | <5 cc                                      | 22.5 Gy                       | 25.5 Gy               | neuropathy                     |
| Esophagus*                  | <5 cc                                      | 27.9 Gy                       | 32.4 Gy               | esophagitis                    |
| Brachial Plexus             | <3 cc                                      | 22 Gy                         | 26 Gy                 | neuropathy                     |
| Heart/Pericardium           | <15 cc                                     | 24 Gy                         | 30 Gy                 | pericarditis                   |
| Great vessels               | <10 cc                                     | 39 Gy                         | 45 Gy                 | aneurysm                       |
| Trachea and Large Bronchus* | <5 cc                                      | 39 Gy                         | 43 Gy                 | impairment of pulmonary toilet |
| Bronchus- smaller airways   | <0.5 cc                                    | 25.8 Gy                       | 30 Gy                 | stenosis with atelectasis      |
| Rib                         | <5 cc                                      | 40 Gy                         | 50 Gy                 | Pain or fracture               |
| Skin                        | <10 cc                                     | 31 Gy                         | 33 Gy                 | ulceration                     |
| Stomach                     | <5 cc                                      | 22.5 Gy                       | 30 Gy                 | ulceration/fistula             |
| Bile duct                   |                                            |                               | 36 Gy                 | stenosis                       |
| Duodenum*                   | <5 cc                                      | 22.5 Gy                       | 30 Gy                 | ulceration                     |
| Jejunum/Ileum*              | <30 cc                                     | 20.7 Gy                       | 28.5 Gy               | enteritis/obstruction          |
| Colon*                      | <20 cc                                     | 28.8 Gy                       | 45 Gy                 | colitis/fistula                |
| Rectum*                     | <3.5 cc<br><20 cc                          | 43 Gy<br>30.3 Gy              | 47 Gy                 | proctitis/fistula              |
| Ureter                      |                                            |                               | 40 Gy                 | stenosis                       |
| Bladder wall                | <15 cc                                     | 17 Gy                         | 33 Gy                 | cystitis/fistula               |
| Penile bulb                 | <3 cc                                      | 25 Gy                         |                       | impotence                      |
| Femoral Heads               | <10 cc                                     | 24 Gy                         |                       | necrosis                       |
| Renal hilum/vascular trunk  | 15 cc                                      | 19.5 Gy                       |                       | malignant hypertension         |
|                             |                                            |                               |                       |                                |
| Parallel Tissue             | Critical Volume (cc)                       | Critical Volume Dose Max (Gy) |                       | Endpoint (≥Grade 3)            |
| Lung (Right & Left)         | 1500 cc for males and 950cc for females*** | 10.8 Gy                       |                       | Basic Lung Function            |
| Lung (Right & Left)         |                                            |                               | V-11.4Gy<37%          | Pneumonitis                    |
| Liver                       | 700 cc***                                  | 17.7 Gy                       |                       | Basic Liver Function           |
| Renal cortex (Right & Left) | 200 cc***                                  | 14.7 Gy                       |                       | Basic renal function           |

\*Avoid circumferential irradiation

\*\* “point” defined as 0.035cc or less

\*\*\*or one third of the “native” total organ volume (prior to any resection or volume reducing disease), whichever is greater

### Five Fractions

| Serial Tissue               | Volume                                     | Volume Max (Gy)               | Max Point Dose (Gy)** | Endpoint (≥Grade 3)            |
|-----------------------------|--------------------------------------------|-------------------------------|-----------------------|--------------------------------|
| Optic Pathway               | <0.2 cc                                    | 23 Gy                         | 25 Gy                 | neuritis                       |
| Cochlea                     |                                            |                               | 22 Gy                 | hearing loss                   |
| Brainstem (not medulla)     | <0.5 cc                                    | 23 Gy                         | 31 Gy                 | cranial neuropathy             |
| Spinal Cord and medulla     | <0.35 cc                                   | 22 Gy                         | 28 Gy                 | myelitis                       |
| Cauda Equina                | <5 cc                                      | 30 Gy                         | 31.5 Gy               | neuritis                       |
| Sacral Plexus               | <5 cc                                      | 30 Gy                         | 32 Gy                 | neuropathy                     |
| Esophagus*                  | <5 cc                                      | 32.5 Gy                       | 38 Gy                 | esophagitis                    |
| Brachial Plexus             | <3 cc                                      | 27 Gy                         | 32.5 Gy               | neuropathy                     |
| Heart/Pericardium           | <15 cc                                     | 32 Gy                         | 38 Gy                 | pericarditis                   |
| Great vessels               | <10 cc                                     | 47 Gy                         | 53 Gy                 | aneurysm                       |
| Trachea and Large Bronchus* | <5 cc                                      | 45 Gy                         | 50 Gy                 | impairment of pulmonary toilet |
| Bronchus- smaller airways   | <0.5 cc                                    | 32 Gy                         | 40 Gy                 | stenosis with atelectasis      |
| Rib                         | <5 cc                                      | 45 Gy                         | 57 Gy                 | Pain or fracture               |
| Skin                        | <10 cc                                     | 36.5 Gy                       | 38.5 Gy               | ulceration                     |
| Stomach                     | <5cc                                       | 26.5 Gy                       | 35 Gy                 | ulceration/fistula             |
| Bile duct                   |                                            |                               | 41 Gy                 | stenosis                       |
| Duodenum*                   | <5 cc                                      | 26.5 Gy                       | 35 Gy                 | ulceration                     |
| Jejunum/Ileum*              | <30 cc                                     | 24 Gy                         | 34.5 Gy               | enteritis/obstruction          |
| Colon*                      | <20 cc                                     | 32.5 Gy                       | 52.5 Gy               | colitis/fistula                |
| Rectum*                     | <3.5 cc<br><20 cc                          | 50 Gy<br>37.5 Gy              | 55 Gy                 | proctitis/fistula              |
| Ureter                      |                                            |                               | 45 Gy                 | stenosis                       |
| Bladder wall                | <15 cc                                     | 20 Gy                         | 38 Gy                 | cystitis/fistula               |
| Penile Bulb                 | <3 cc                                      | 30 Gy                         |                       | impotence                      |
| Femoral Heads               | <10 cc                                     | 30 Gy                         |                       | necrosis                       |
| Renal hilum/vascular trunk  | 15 cc                                      | 23 Gy                         |                       | malignant hypertension         |
|                             |                                            |                               |                       |                                |
| Parallel Tissue             | Critical Volume (cc)                       | Critical Volume Dose Max (Gy) |                       | Endpoint (≥Grade 3)            |
| Lung (Right & Left)         | 1500 cc for males and 950cc for females*** | 12.5 Gy                       |                       | Basic Lung Function            |
| Lung (Right & Left)         |                                            |                               | V-13.5Gy<37%          | Pneumonitis                    |
| Liver                       | 700 cc***                                  | 21.5 Gy                       |                       | Basic Liver Function           |
| Renal cortex (Right & Left) | 200 cc***                                  | 17.5 Gy                       |                       | Basic renal function           |

\*Avoid circumferential irradiation

\*\* “point” defined as 0.035cc or less

\*\*\*or one third of the “native” total organ volume (prior to any resection or volume reducing disease), whichever is greater
