# Supplementary material
Source: PubMed Central journal article supplement (PMC5555369)
Supplement: NIHMS876292-supplement-Table_E3.pdf [file NIHMS876292-supplement-Table_E3.pdf]

**Appendix Table A3. Univariate Dosimetric Analysis (as continuous variable) for Local Control**

|                                  | Median (Range)        | Hazard Ratio (95% CI) | p-value |
|----------------------------------|-----------------------|-----------------------|---------|
| Dose per fx (Gy)                 | 11 (4-40)             | 0.85 (0.74, 0.96)     | 0.0123  |
| Target volume (cm <sup>3</sup> ) | 26.55 (0.19-557)      | 1.00 (0.997, 1.01)    | 0.4288  |
| Vscript (%)                      | 95 (67.6-100)         | 0.96 (0.84, 1.10)     | 0.5331  |
| Dscript BED                      | 134.54 (32-288.38)    | 0.98 (0.97, 0.99)     | 0.0005  |
| D99 BED                          | 114.98 (0.42-264.22)  | 0.97 (0.96, 0.99)     | <0.0001 |
| D95 BED                          | 134.54 (32-289.73)    | 0.98 (0.97, 0.99)     | 0.0004  |
| D90 BED                          | 141.29 (33.63-313.97) | 0.98 (0.97, 0.99)     | 0.0010  |
| D1 BED                           | 173.93 (54.52-512.69) | 0.99 (0.98, 0.998)    | 0.0129  |
