# Supplementary material
Source: PubMed Central journal article supplement (PMC5555369)
Supplement: NIHMS876292-supplement-Table_E4.pdf [file NIHMS876292-supplement-Table_E4.pdf]

| Appendix Table A4. Late Grade 3 Toxicity, Organ at Risk, and Dosimetric Information |          |                                       |                        |             |            |              |                   |             |             |                |                               |                                     |                                                                                                                                                              |
|-------------------------------------------------------------------------------------|----------|---------------------------------------|------------------------|-------------|------------|--------------|-------------------|-------------|-------------|----------------|-------------------------------|-------------------------------------|--------------------------------------------------------------------------------------------------------------------------------------------------------------|
| Patient                                                                             | Site     | Description                           | OAR                    | PTV<br>(cc) | SBRT       | D5cc<br>(Gy) | Dmax<br>(0.035cc) | V14<br>(cc) | V20<br>(cc) | V20/V14<br>(%) | Recommended<br>Constrain      | Meeting<br>Constrain<br>(Yes vs No) | Note                                                                                                                                                         |
| A                                                                                   | L3       | left lower extremity<br>radiculopathy | L2-L3<br>Nerve<br>root | 11.67       | 20Gy x 1fx | NA           | 20.5              | NA          | NA          | NA             | 1fx: 14.4Gy<5cc,<br>max <16Gy | No                                  | Tumor involved neural<br>foramina                                                                                                                            |
| B                                                                                   | L2       | Persistent pain -><br>Vertebroplasty  | L2                     | 1.68        | 20Gy x 1fx | 18.7         | 24.9              | 36.07       | 1.68        | 4.7%           | 1fx: 28Gy<5cc,<br>max<33Gy    | NA                                  | Mild height loss on L2, but<br>vertebroplasty on multiple<br>levels with systemic<br>progression, passed away 2<br>month after due to disease<br>progression |
| C                                                                                   | T11      | Worsen pain -><br>Vertebroplasty      | T11                    | 18.38       | 20Gy x 1fx | 23.25        | 24.3              | 23.65       | 14.2        | 60.0%          | 1fx: 28Gy<5cc,<br>max<33Gy    | NA                                  | Tumor volume >40% of<br>vertebral body.                                                                                                                      |
| D                                                                                   | Pancreas | Stomach ulcer, GIB,<br>required PRBC  | Stomach                | 19          | 8Gy x 5fx  | 31           | 42.3              | NA          | NA          | NA             | 5fx: 26.5Gy<5cc,<br>max <35Gy | No                                  | On VGEF/TKI. Bleeding<br>location was not confirmed.                                                                                                         |
| E                                                                                   | LLL lung | Gastric perforation                   | Stomach                | 4.1         | 27Gy x 1fx | 9.8          | 22.5              | NA          | NA          | NA             | 1fx: 17.4Gy<5cc,<br>max 22Gy  | No                                  | On VGEF/TKI. Bleeding<br>location was not confirmed.                                                                                                         |
